# Supplementary material
Source: PubMed Central journal article supplement (PMC3281715)

**A) Supplement Figure 1. PGAM1 is acetylated *in vivo*.**

Endogenous PGAM1 is immunoprecipitated by Anti-Acetyl-lysine and Protein G from HEK293 cells incubated overnight with 5mM NAM / 5 $\mu$ M TSA. These extracts were resolved by SDS-PAGE and detected by Western blotting with anti-PGAM1 antibody.

**Supplement Figure 2. Acetylation of PGAM1 is increased upon co-expression with Sirt1 siRNA.**

**A)** Soluble extracts and Immunoprecipitants from HEK293 cells transiently transfected with PGAM1 and siRNA to Sirt1-3 were resolved by SDS-page and detected through Western blot, with anti-acetyl-lysine and anti-PGAM1 antibodies. Input blots were detected with anti-PGAM1 antibody, and Anti-Sirt1.

**B-C)** Activity was measured at 340nm by PGAM1 coupled assay.

Hallows et al. Sup. Fig. 1

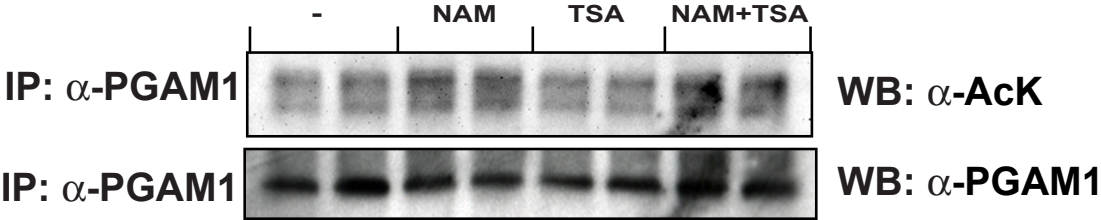

Hallows et al. Sup. Fig. 2

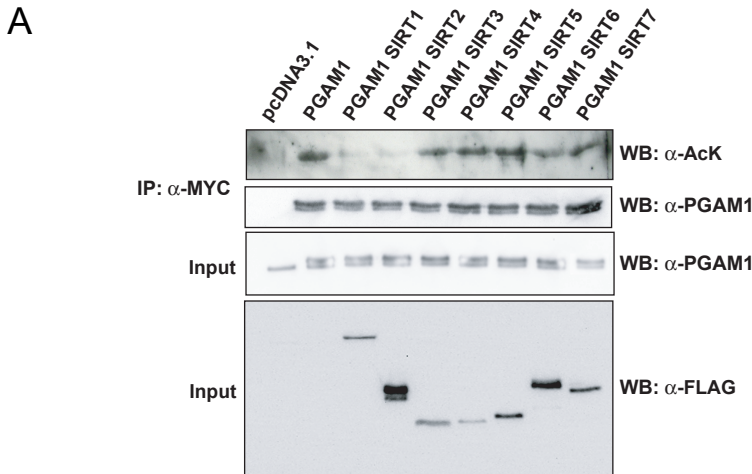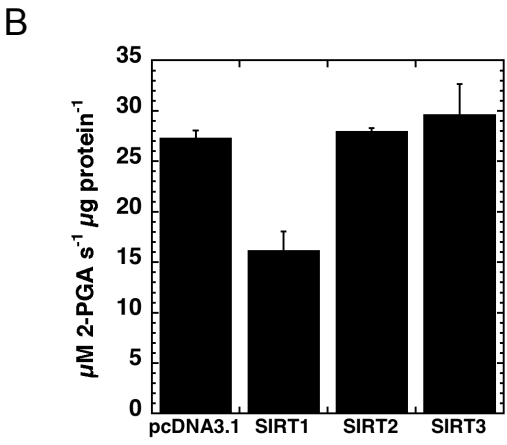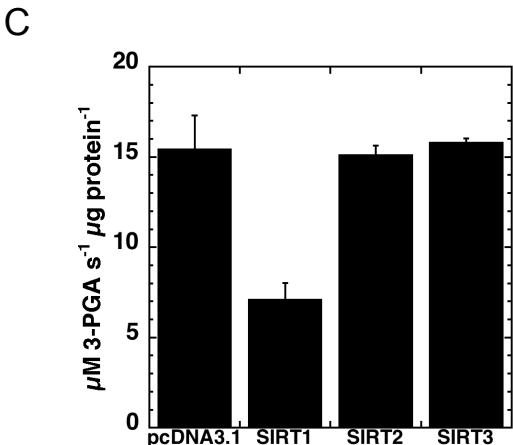

Supplement: supp_M111.317404_jbc.M111.317404-1.pdf [file supp_M111.317404_jbc.M111.317404-1.pdf]
